# Supplementary material for: Development and external validation of a nomogram to predict prolonged postoperative mechanical ventilation in patients with acute type A aortic dissection
Source: Research Square preprint supplement (doi:10.21203/rs.3.rs-7001055/v1), 2025-08-05

**The First Affiliated Hospital of Anhui Medical University**  
**The Committee on Medical Ethics**

**Ethical Approval**

|                                                                                                                                                                                                                                                                                                                                               |                                                                                                                     |                   |                      |
|-----------------------------------------------------------------------------------------------------------------------------------------------------------------------------------------------------------------------------------------------------------------------------------------------------------------------------------------------|---------------------------------------------------------------------------------------------------------------------|-------------------|----------------------|
| Reference number                                                                                                                                                                                                                                                                                                                              | <b>Quick -PJ 2023-12-62</b>                                                                                         |                   |                      |
| Project title                                                                                                                                                                                                                                                                                                                                 | <b>The risk factors of prolonged postoperative ICU stay for the patients with Stanford type A aortic dissection</b> |                   |                      |
| Name of research department                                                                                                                                                                                                                                                                                                                   | <b>Cardiovascular surgery</b>                                                                                       |                   |                      |
| Principal investigator                                                                                                                                                                                                                                                                                                                        | <b>Haiyuan-Liu</b>                                                                                                  |                   |                      |
| Type of review                                                                                                                                                                                                                                                                                                                                | <b>Research articles</b>                                                                                            | Method of review  | <b>Quick Review</b>  |
| Review date                                                                                                                                                                                                                                                                                                                                   | <b>17-10-2023</b>                                                                                                   | Committee referee | <b>Maoming-Xiong</b> |
| Review opinions:                                                                                                                                                                                                                                                                                                                              |                                                                                                                     |                   |                      |
| According to the ministry of health 《Ethics review on biomedical research involving human subjects》, WMA 《The declaration of Helsinki》 and CIOMS 《International ethical guidelines for biomedical research involving》, the committee have agreed to report the review results, to carry out the research and to publish the research results. |                                                                                                                     |                   |                      |
| Contact person                                                                                                                                                                                                                                                                                                                                | Ying Ge +86551-62922017                                                                                             |                   |                      |
| Signed on behalf of the Committee                                                                                                                                                                                                                                                                                                             | 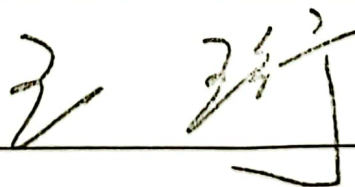                                |                   |                      |
| Ethics committee                                                                                                                                                                                                                                                                                                                              |                                |                   |                      |
| Date                                                                                                                                                                                                                                                                                                                                          | 18-10-2023                                                                                                          |                   |                      |

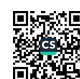

Supplement: Supplementary file 1 [file 0abbdf8098d59b4f78043b22.pdf]
